# Supplementary material for: Three-step Förster resonance energy transfer on an amyloid fibril scaffold
Source: Royal Society of Chemistry journal article supplement (doi:10.1039/d1cp01359a), 2021-01-01
Supplement: d1cp01359a1.pdf [file d1cp01359a1.pdf]

## Supporting information

### Three-step Förster resonance energy transfer on amyloid fibril scaffold

Galyna Gorbenko<sup>1\*</sup>, Olga Zhytniakivska<sup>1</sup>, Kateryna Vus<sup>1</sup>, Uliana Tarabara<sup>1</sup>, Valeriya Trusova<sup>1</sup>

<sup>1</sup>*Department of Medical Physics and Biomedical Nanotechnologies, V.N. Karazin Kharkiv National University, 4 Svobody Sq., Kharkiv, 61022, Ukraine*

## Supporting figures

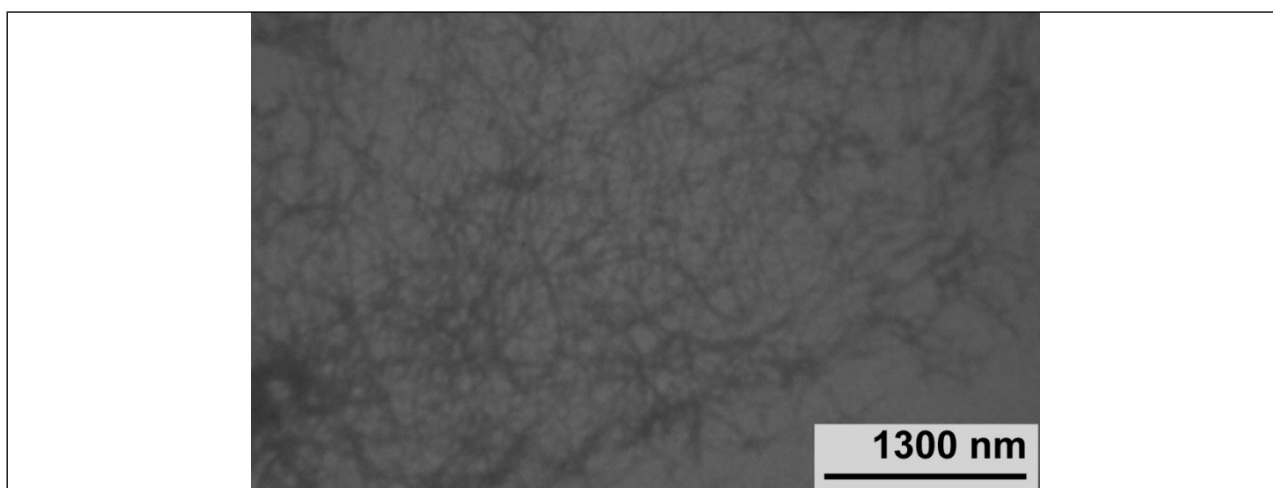

**Figure S1.** Transmission electron microscopy image of the insulin amyloid fibrils.

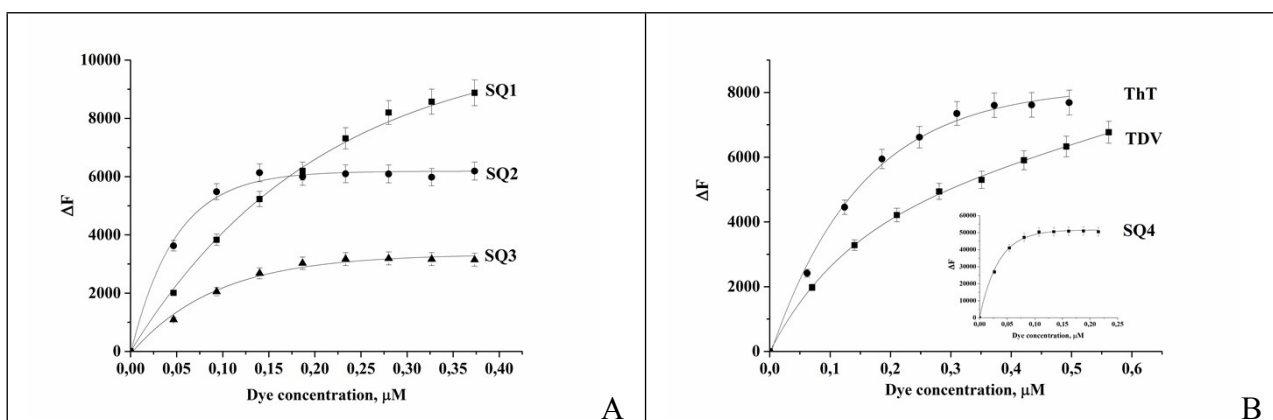

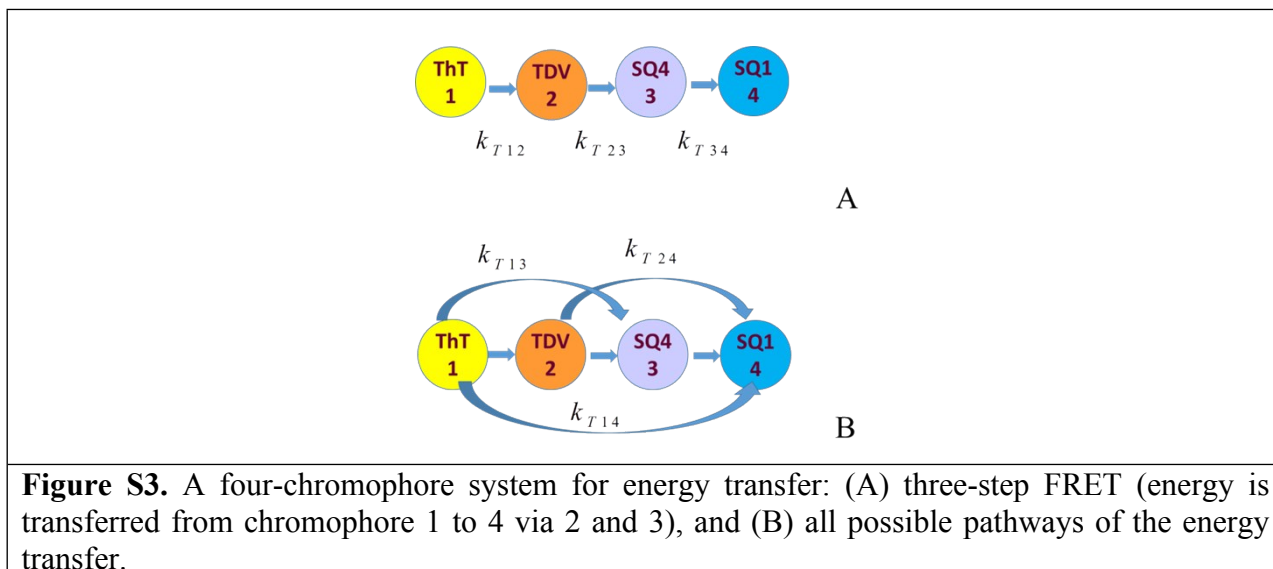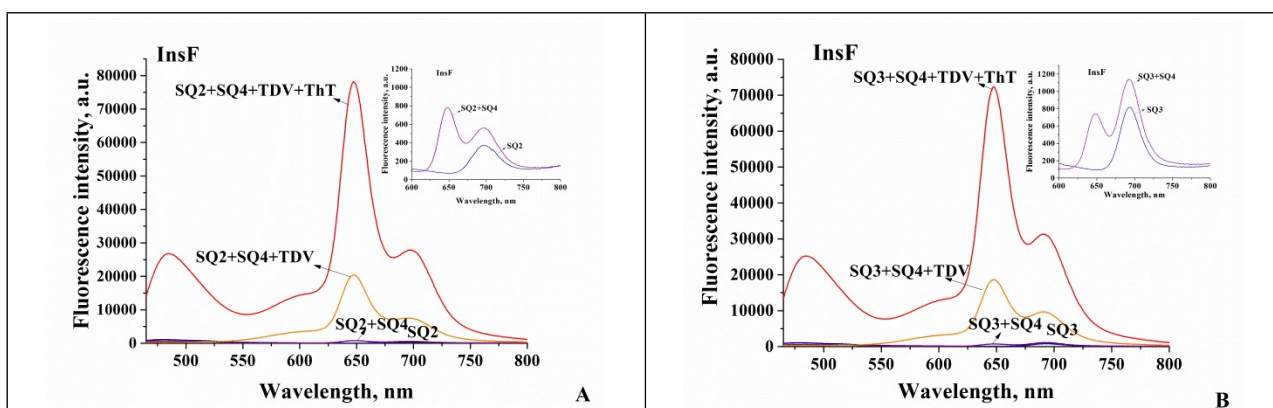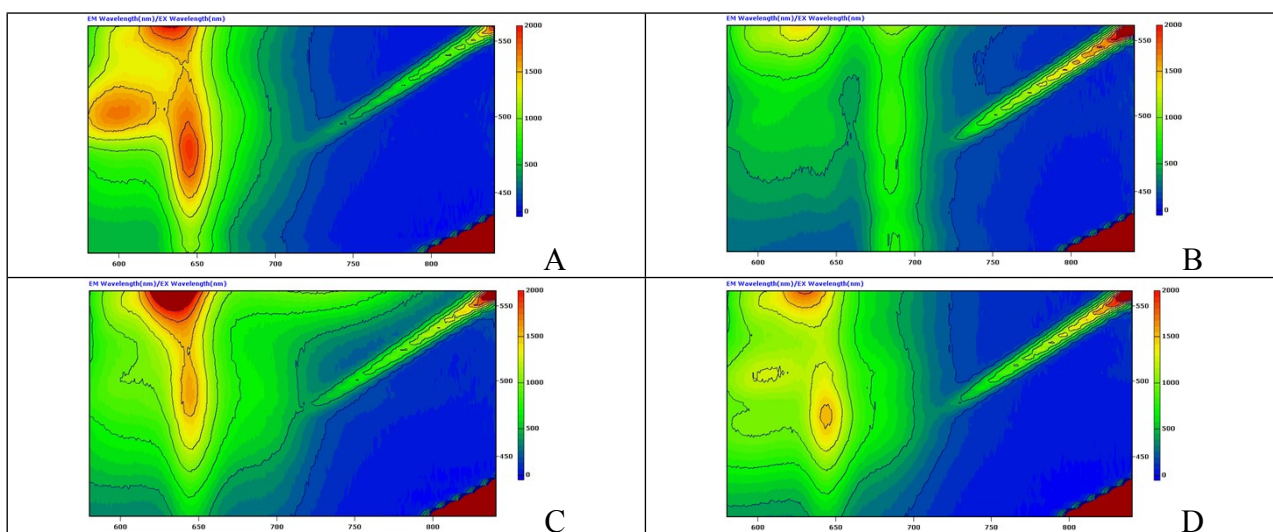

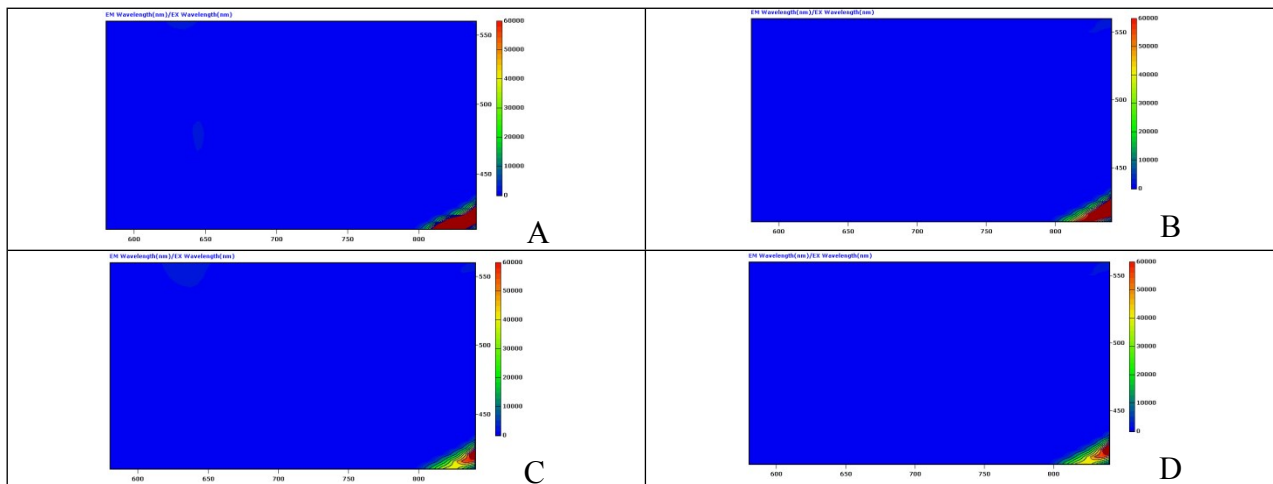

**Figure S6.** 3D fluorescence contour maps of non-fibrillized insulin plotted in the same scale as those obtained for fibrillar protein (Figure 3) with the chromophore systems ThT-TDV-SQ4 (A) and ThT-TDV-SQ4-SQ1/2/3 (B)-(D).

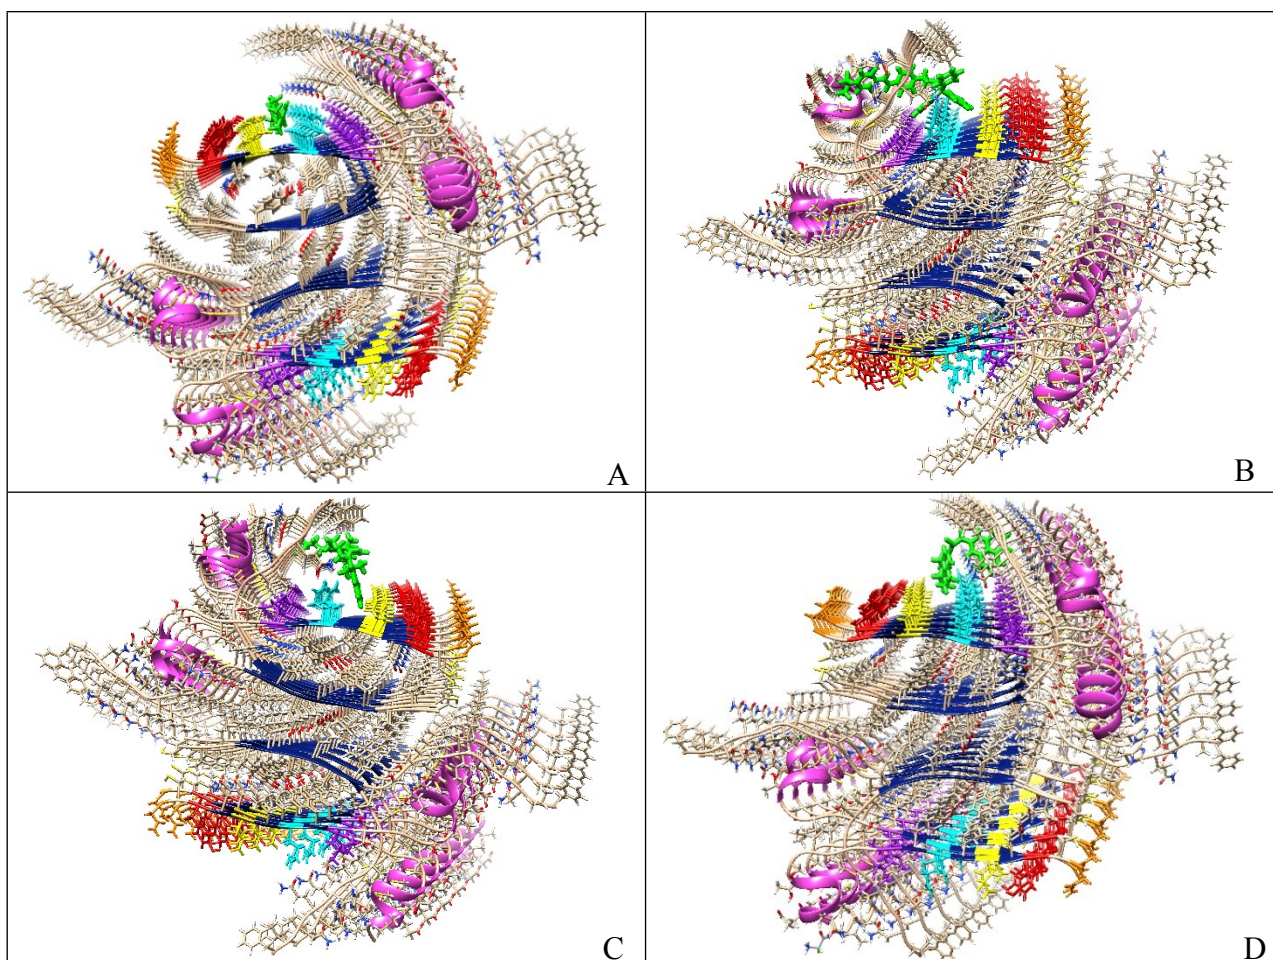

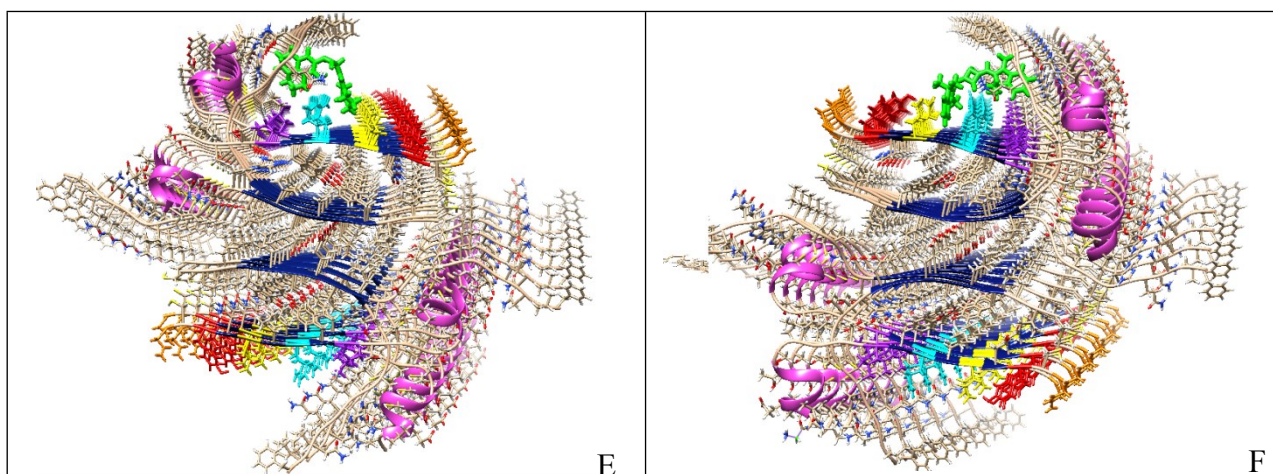

**Figure S7.** The energetically most favorable complexes of ThT (A), TDV (B), SQ1 (C), SQ2 (D), SQ3 (E) and SQ4 (F) with the the insulin fibrils obtained with the SwissDock tool. The residues Leu13, Gln15, Glu17 and Tyr19 are colored in purple, cyan, yellow and red, respectively. The binding energies of the docked complexes were estimated to be -8.46 kcal/mol (ThT), -8.49 kcal/mol (TDV), -8.0 kcal/mol (SQ1), -8.12 kcal/mol (SQ2), -8.06 kcal/mol (SQ3), -9.26 kcal/mol (SQ4).

## Supporting tables

**Table S1.** The Förster radii and overlap integrals for the donor-acceptor pairs involved in the cascade FRET

| Donor-acceptor pair | Förster radius, nm | Overlap integral, $M^{-1}cm^{-1}nm^4$ |
|---------------------|--------------------|---------------------------------------|
| ThT - TDV           | 2.41               | $8.14 \times 10^{14}$                 |
| TDV – SQ4           | 5.58               | $1.75 \times 10^{16}$                 |
| SQ4 – SQ1           | 4.96               | $1.65 \times 10^{16}$                 |
| SQ4 – SQ2           | 4.88               | $1.50 \times 10^{16}$                 |
| SQ4 – SQ3           | 5.18               | $2.14 \times 10^{16}$                 |
| ThT – SQ1           | 2.81               | $2.05 \times 10^{15}$                 |
| ThT – SQ2           | 2.71               | $1.67 \times 10^{15}$                 |
| ThT – SQ3           | 2.96               | $2.80 \times 10^{15}$                 |
| ThT – SQ4           | 2.95               | $2.78 \times 10^{15}$                 |
| TDV – SQ1           | 4.75               | $6.68 \times 10^{15}$                 |
| TDV – SQ2           | 4.61               | $5.55 \times 10^{15}$                 |
| TDV – SQ3           | 4.98               | $8.79 \times 10^{15}$                 |

**Table S2.** Quantitative parameters of the dye binding to fibrillar and non-fibrillized insulin

| Dye | Fibrillar insulin        |                   |                  | Non-fibrillized insulin  |                   |                  |
|-----|--------------------------|-------------------|------------------|--------------------------|-------------------|------------------|
|     | $F_{mol}, \mu M^{-1}$    | $K_a, \mu M^{-1}$ | $n$              | $F_{mol}, \mu M^{-1}$    | $K_a, \mu M^{-1}$ | $n$              |
| SQ1 | $9.9 \pm 1.9 \cdot 10^4$ | $23.6 \pm 5.1$    | $0.04 \pm 0.006$ | $5.3 \pm 1.1 \cdot 10^3$ | $25.1 \pm 4.9$    | $0.08 \pm 0.013$ |
| SQ2 | $1.1 \pm 0.2 \cdot 10^5$ | $69.9 \pm 11$     | $0.03 \pm 0.005$ | $4.3 \pm 0.7 \cdot 10^3$ | $63.1 \pm 12$     | $0.01 \pm 0.002$ |
| SQ3 | $2.2 \pm 0.3 \cdot 10^4$ | $71.4 \pm 13$     | $0.08 \pm 0.015$ | $1.1 \pm 0.2 \cdot 10^3$ | $63.2 \pm 11$     | $0.04 \pm 0.005$ |
| SQ4 | $1.9 \pm 0.3 \cdot 10^6$ | $62.2 \pm 11$     | $0.01 \pm 0.002$ | $2.0 \pm 0.3 \cdot 10^4$ | $12.0 \pm 2.1$    | $0.05 \pm 0.009$ |
| TDV | $3.6 \pm 0.7 \cdot 10^4$ | $28.6 \pm 5.4$    | $0.07 \pm 0.013$ | $8.9 \pm 1.9 \cdot 10^3$ | $0.55 \pm 0.1$    | $0.25 \pm 0.04$  |
| ThT | $1.8 \pm 0.3 \cdot 10^5$ | $36.6 \pm 7.1$    | $0.02 \pm 0.005$ | *                        | *                 | *                |

\* - not determined

**Table S3.** The limits for donor-acceptor separation derived from Eq. (5) for given values of orientation factor

| Donor-acceptor pair | $R, \text{ nm}^*$ |                   |                |                |
|---------------------|-------------------|-------------------|----------------|----------------|
|                     | $\kappa^2 = 0.01$ | $\kappa^2 = 0.67$ | $\kappa^2 = 1$ | $\kappa^2 = 4$ |
| ThT – TDV           | 1.22              | 2.47              | 2.64           | 3.32           |
| TDV – SQ4           | 2.57              | 5.17              | 5.53           | 6.96           |
| SQ4 – SQ1           | 2.59              | 5.22              | 5.58           | 7.03           |
| SQ4 – SQ2           | 2.98              | 6.0               | 6.41           | 8.08           |
| SQ4 – SQ3           | 3.02              | 6.08              | 6.49           | 8.18           |

The uncertainty in  $R$  value does not exceed 0.3 nm.

**Table S4.** The estimates of the Förster radius and orientation factor obtained from the approximation of experimental data by Eq. (7)

| Donor-acceptor pair | Förster radius, nm | Orientation factor   |
|---------------------|--------------------|----------------------|
| ThT – TDV           | 2.27               | 0.47                 |
| TDV – SQ4           | 5.96               | 0.99                 |
| SQ4 – SQ1           | 2.30               | $6.7 \times 10^{-3}$ |
| SQ4 – SQ2           | 3.13               | $4.7 \times 10^{-2}$ |
| SQ4 – SQ3           | 1.56               | $5.0 \times 10^{-4}$ |

**Theoretical description of FRET in four-chromophore system for the case when the energy is transferred sequentially from the initial donor to the terminal acceptor**

$$\frac{d[C_1^*]}{dt} = -[C_1^*](k_{T12} + \tau_1^{-1}) \quad (\text{S1})$$

$$\frac{d[C_2^*]}{dt} = -[C_2^*](k_{T23} + \tau_2^{-1}) + [C_1^*]k_{T12} \quad (\text{S2})$$

$$\frac{d[C_3^*]}{dt} = -[C_3^*](k_{T34} + \tau_3^{-1}) + [C_2^*]k_{T23} \quad (\text{S3})$$

$$\frac{d[C_4^*]}{dt} = -[C_4^*]\tau_4^{-1} + [C_3^*]k_{T34} \quad (\text{S4})$$

where  $[C_i^*]$  is the concentration of the  $i$ -th excited chromophore,  $\tau_i$  is the fluorescence lifetime,  $k_{Tij}$  are the rate constant of energy transfer between the  $i$ -th and  $j$ -th chromophores.

**Theoretical description of FRET in four-chromophore system for the case when the two- and three-step FRET take place in parallel with the one-step energy transfer events**

$$\frac{d[C_1^*]}{dt} = -[C_1^*](k_{T12} + \tau_1^{-1}) \quad (\text{S5})$$

$$\frac{d[C_2^*]}{dt} = -[C_2^*](k_{T23} + k_{T24} + \tau_2^{-1}) + [C_1^*]k_{T12} \quad (\text{S6})$$

$$\frac{d[C_3^*]}{dt} = -[C_3^*](k_{T34} + \tau_3^{-1}) + [C_1^*]k_{T13} + [C_2^*]k_{T23} \quad (\text{S7})$$

$$\frac{d[C_4^*]}{dt} = -[C_4^*]\tau_4^{-1} + [C_1^*]k_{T14} + [C_2^*]k_{T24} + [C_3^*]k_{T34} \quad (\text{S8})$$
